# Supplementary material for: Improved Ti species distribution and hierarchical pores in TS-1: towards regeneration of TS-1 deactivated due to alkali corrosion
Source: Royal Society of Chemistry journal article supplement (doi:10.1039/d0nj00960a), 2020-01-01
Supplement: d0nj00960a1.pdf [file d0nj00960a1.pdf]

## Electronic Supplementary Information (ESI) for

### Improved Ti species distribution and hierarchical pores in TS-1: Towards regeneration of deactivated TS-1 caused by the corrosion of alkali

Mingming Zhang, Yiqiang Wen, Lukuan Zong, Huijuan Wei\*, Xiangyu Wang\*

*Green Catalysis Center, and College of Chemistry, Zhengzhou University, Zhengzhou 450001, P.R. China*

Corresponding author. E-mail: weihuijuan@zzu.edu.cn and wangxiangyu@zzu.edu.cn

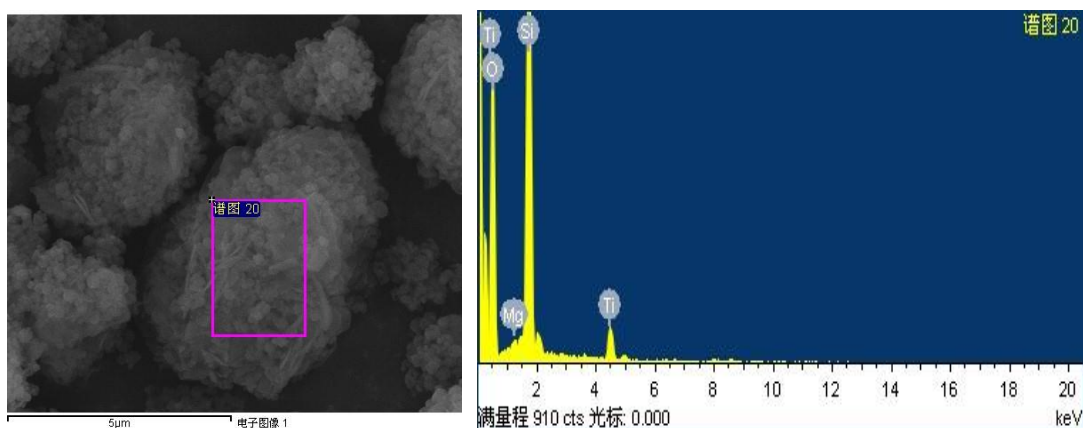

**Fig. S1.** EDS result of agglomerated particles doped with slice-shaped crystals in D-TS-1

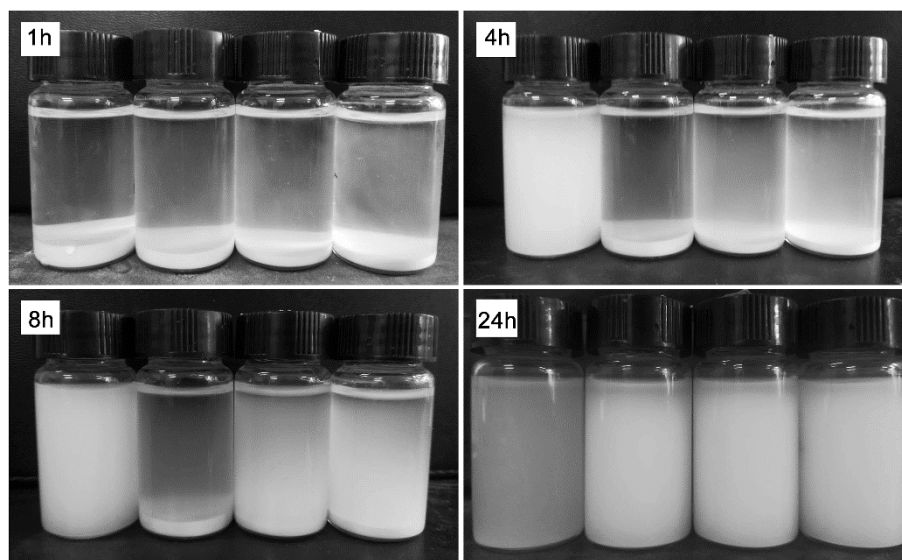

**Fig. S2.** Optical images of sedimentation experiment of F-TS-1, D-TS-1, R-TS-1-F and R-TS-1-S (from left to right) treated with NaOH (1 wt%) solution for different time.

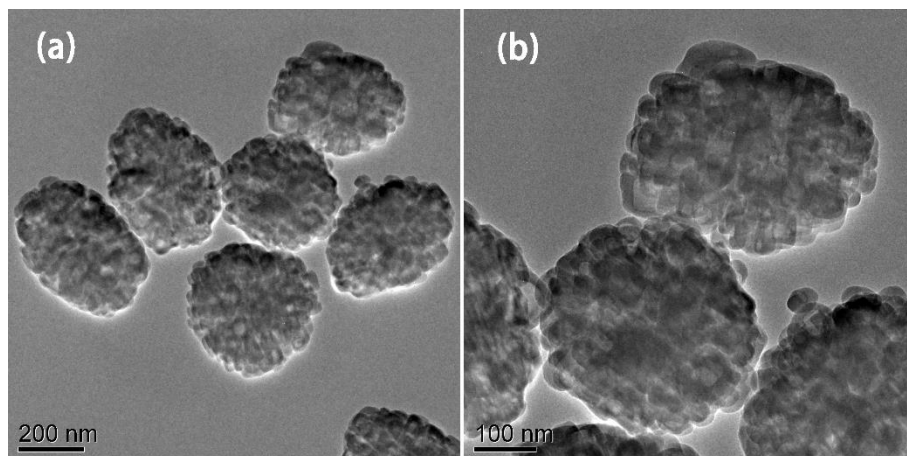

**Fig. S3.** TEM images of hollow TS-1(H-TS-1) (a and b)

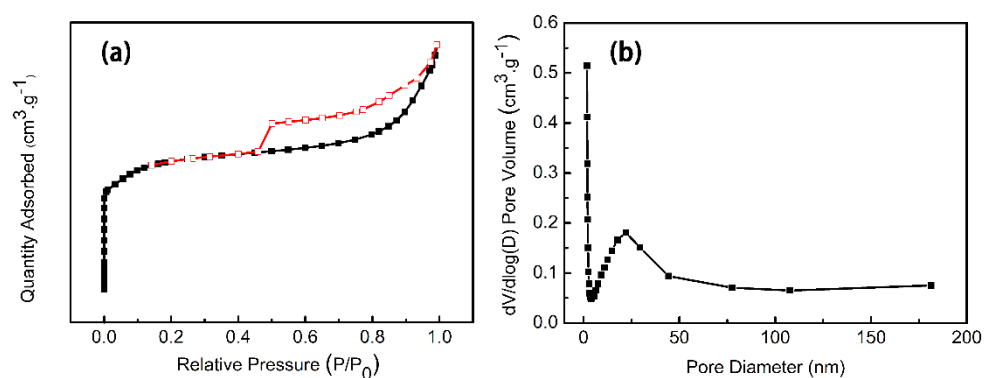

**Fig. S4.**  $\text{N}_2$  adsorption–desorption isotherms (a) and pore size distribution (b) of hollow TS-1(H-TS-1).

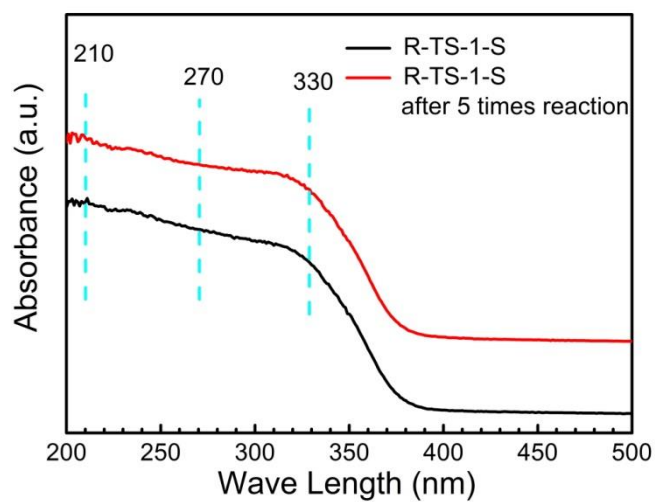

**Fig. S5.** Uv-vis spectra of R-TS-1-S in recycling test

**Table S1.** The catalytic performance for cyclohexanone ammoximation<sup>a</sup> over a mixture of F-TS-1 and amorphous TiO<sub>2</sub>

| Samples <sup>b</sup> | Amount (mg) | X (%) | Y (%) | S (%) |
|----------------------|-------------|-------|-------|-------|
| F-TS-1               | 250         | 71.5  | 70.9  | 99.2  |
| F-TS-1 + Amor        | 250+15      | 69.5  | 68.7  | 98.8  |
| F-TS-1 + Amor        | 250+25      | 62.5  | 61.2  | 98.8  |
| F-TS-1 + Amor        | 250+35      | 55.8  | 55.0  | 98.6  |
| F-TS-1 + Amor        | 250+50      | 51.5  | 50.4  | 97.9  |

<sup>a</sup>Reaction conditions: t-BuOH (16.8 mL); NH<sub>3</sub> H<sub>2</sub>O (70 mmol) added in eight times; H<sub>2</sub>O<sub>2</sub> (70mmol) added dropwise within 70 min; cyclohexanone (60 mmol); temp., 353 K; reaction time (min), 75 min.

<sup>b</sup>F-TS-1 and a mixture of F-TS-1 and Amor. Amor represent amorphous TiO<sub>2</sub>.
